# Supplementary material for: Hyperfine-resolution mapping of on-road vehicle emissions with comprehensive traffic monitoring and an intelligent transportation system
Source: Copernicus journal article supplement (doi:10.5194/acp-21-16985-2021), 2021-11-23
Supplement: Supplementary file 1 [file acp-21-16985-2021-supplement.pdf]

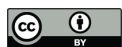

*Supplement of*

## **Hyperfine-resolution mapping of on-road vehicle emissions with comprehensive traffic monitoring and an intelligent transportation system**

**Linhui Jiang et al.**

*Correspondence to:* Shaocai Yu ([shaocaiyu@zju.edu.cn](mailto:shaocaiyu@zju.edu.cn)) and Pengfei Li ([lpf\\_zju@163.com](mailto:lpf_zju@163.com))

The copyright of individual parts of the supplement might differ from the article licence.

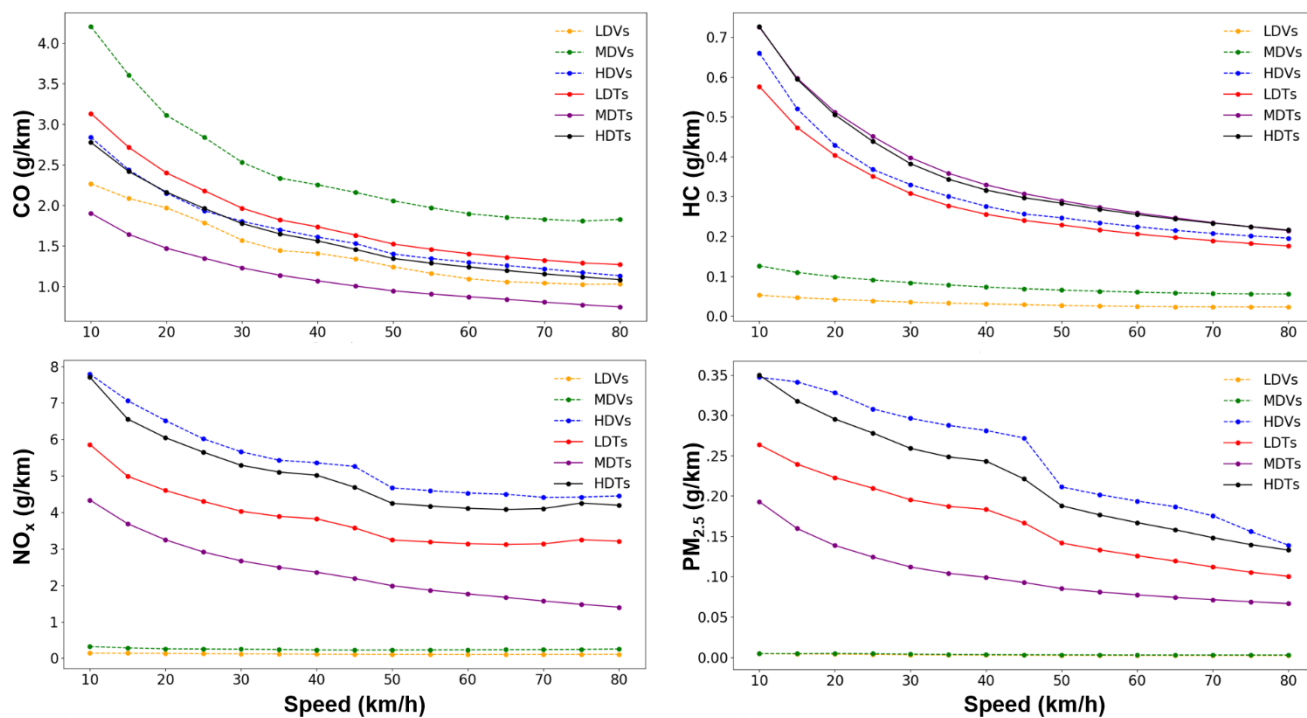

**Figure S1. Vehicle-category- and speed-dependent emissions factors of CO, NO<sub>x</sub>, HC, and PM<sub>2.5</sub>.** Vehicle categories include light duty vehicles (LDVs), middle duty vehicle (MDVs), heavy duty vehicle (HDVs), light duty truck (LDTs), middle duty truck (MDTs), heavy duty truck (HDTs).



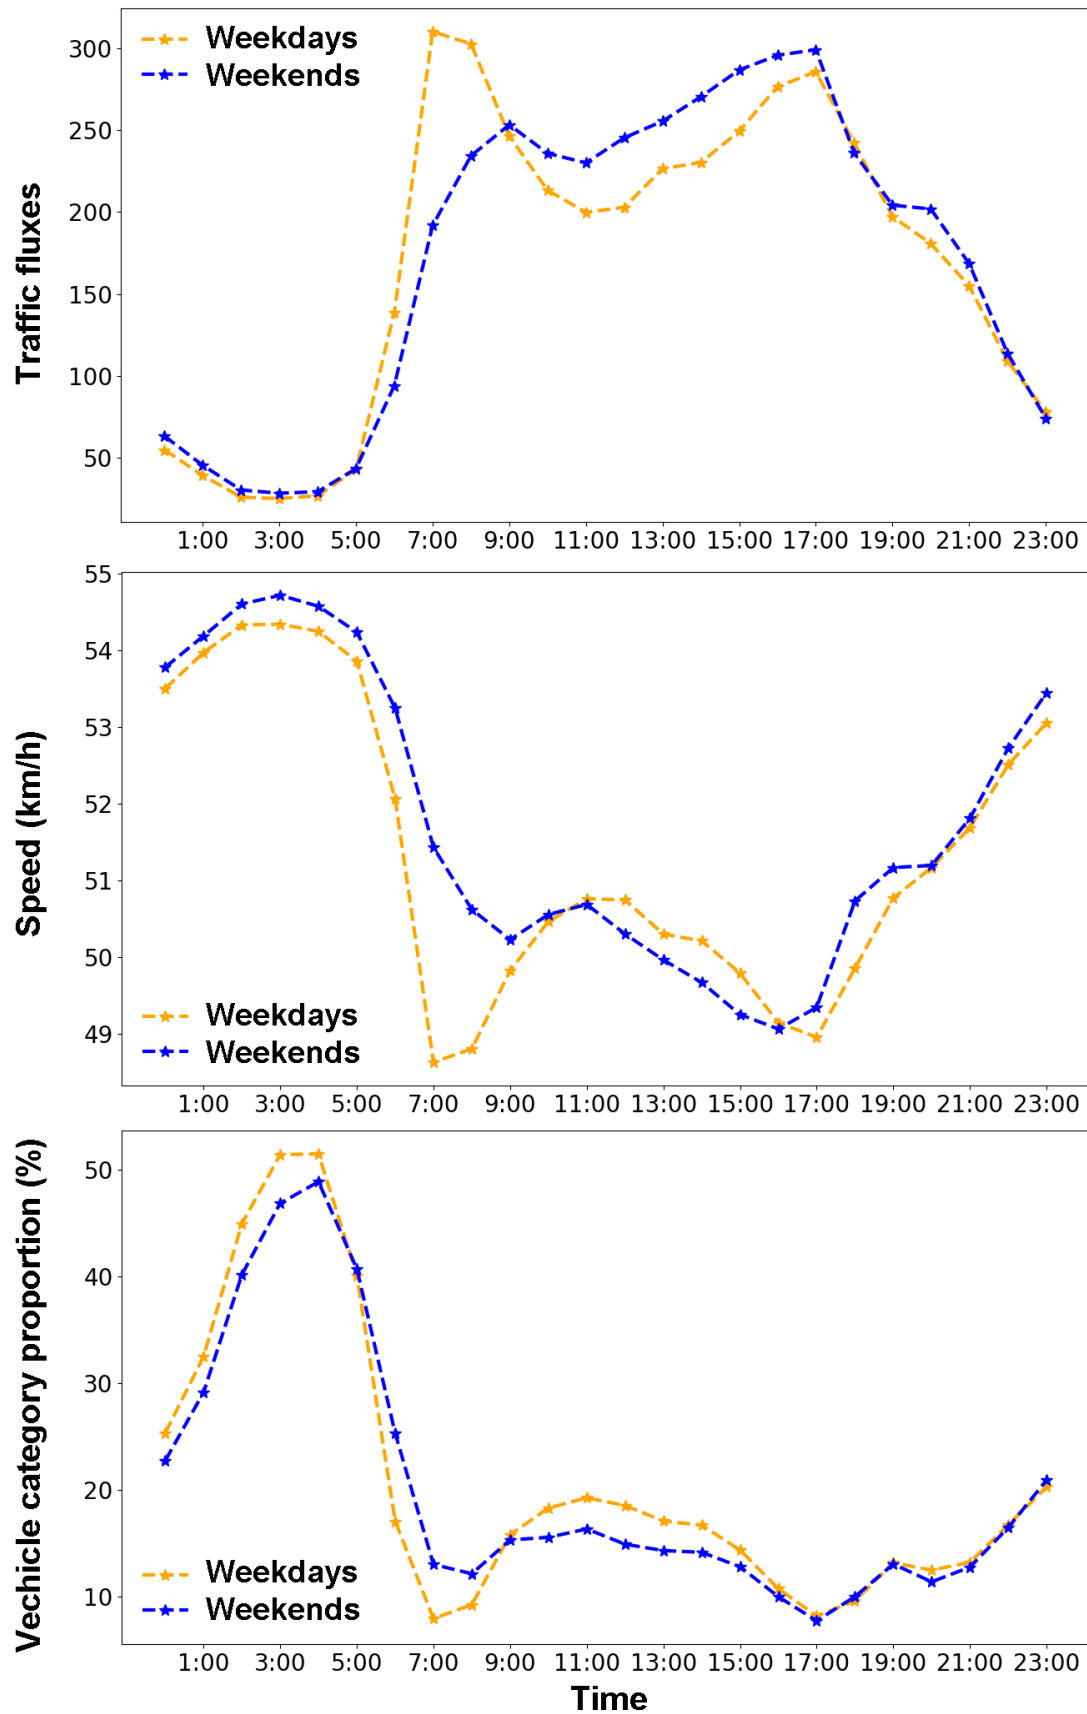

**Figure S2.** Hourly variation of traffic fluxes, speeds, and proportions of HDVs and HDTs on weekdays and weekends.

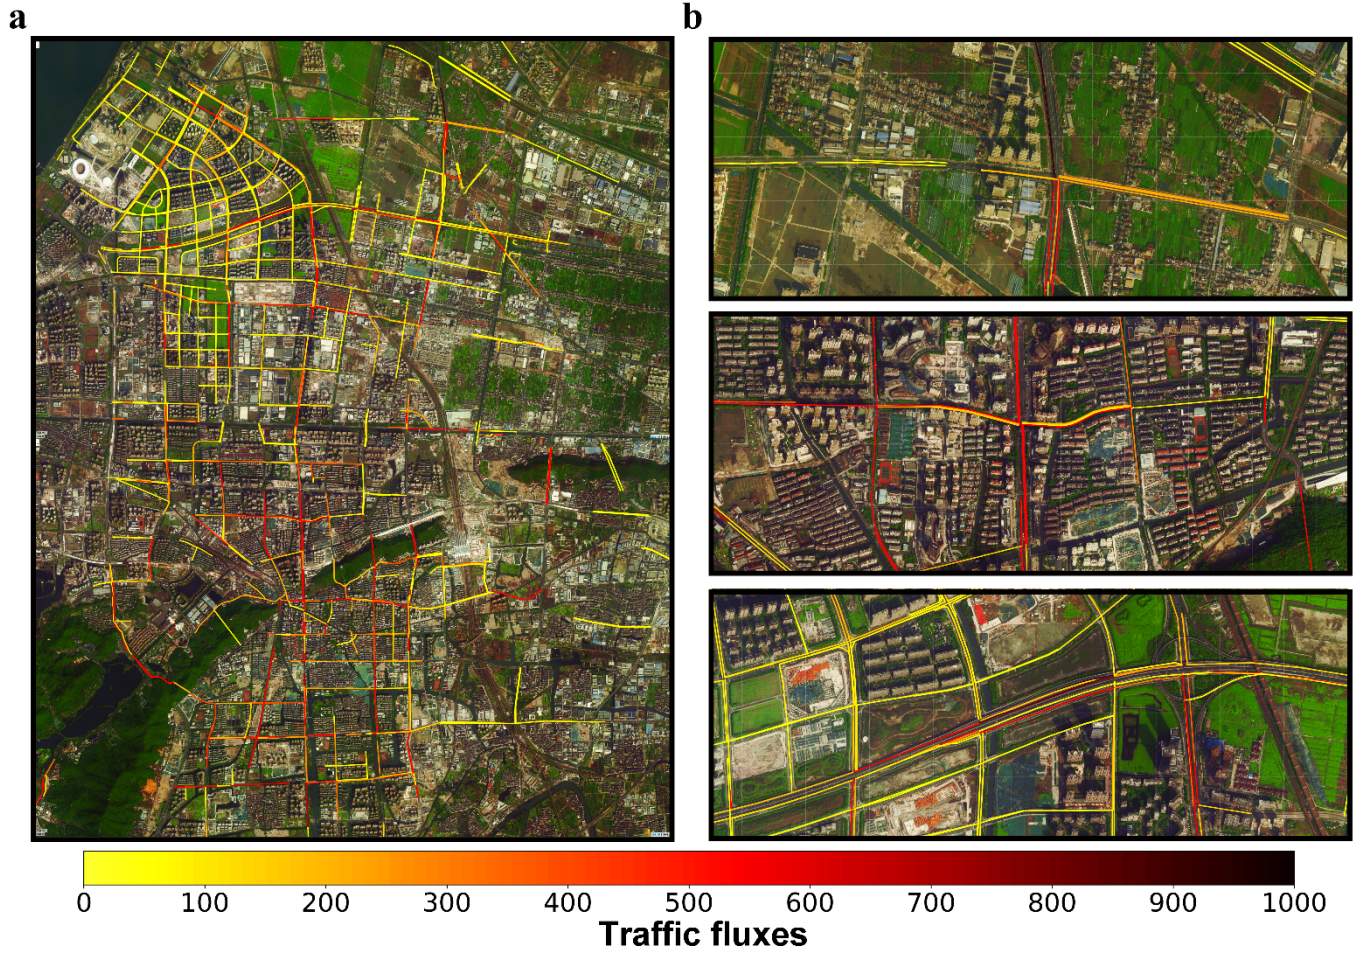

**Figure S3. Hyperfine-resolution mapping of observed traffic fluxes on weekends over the Xiaoshan District.** The same as Figs. 3a and 3b but for weekends. Map data © 2021, Gaode Map.



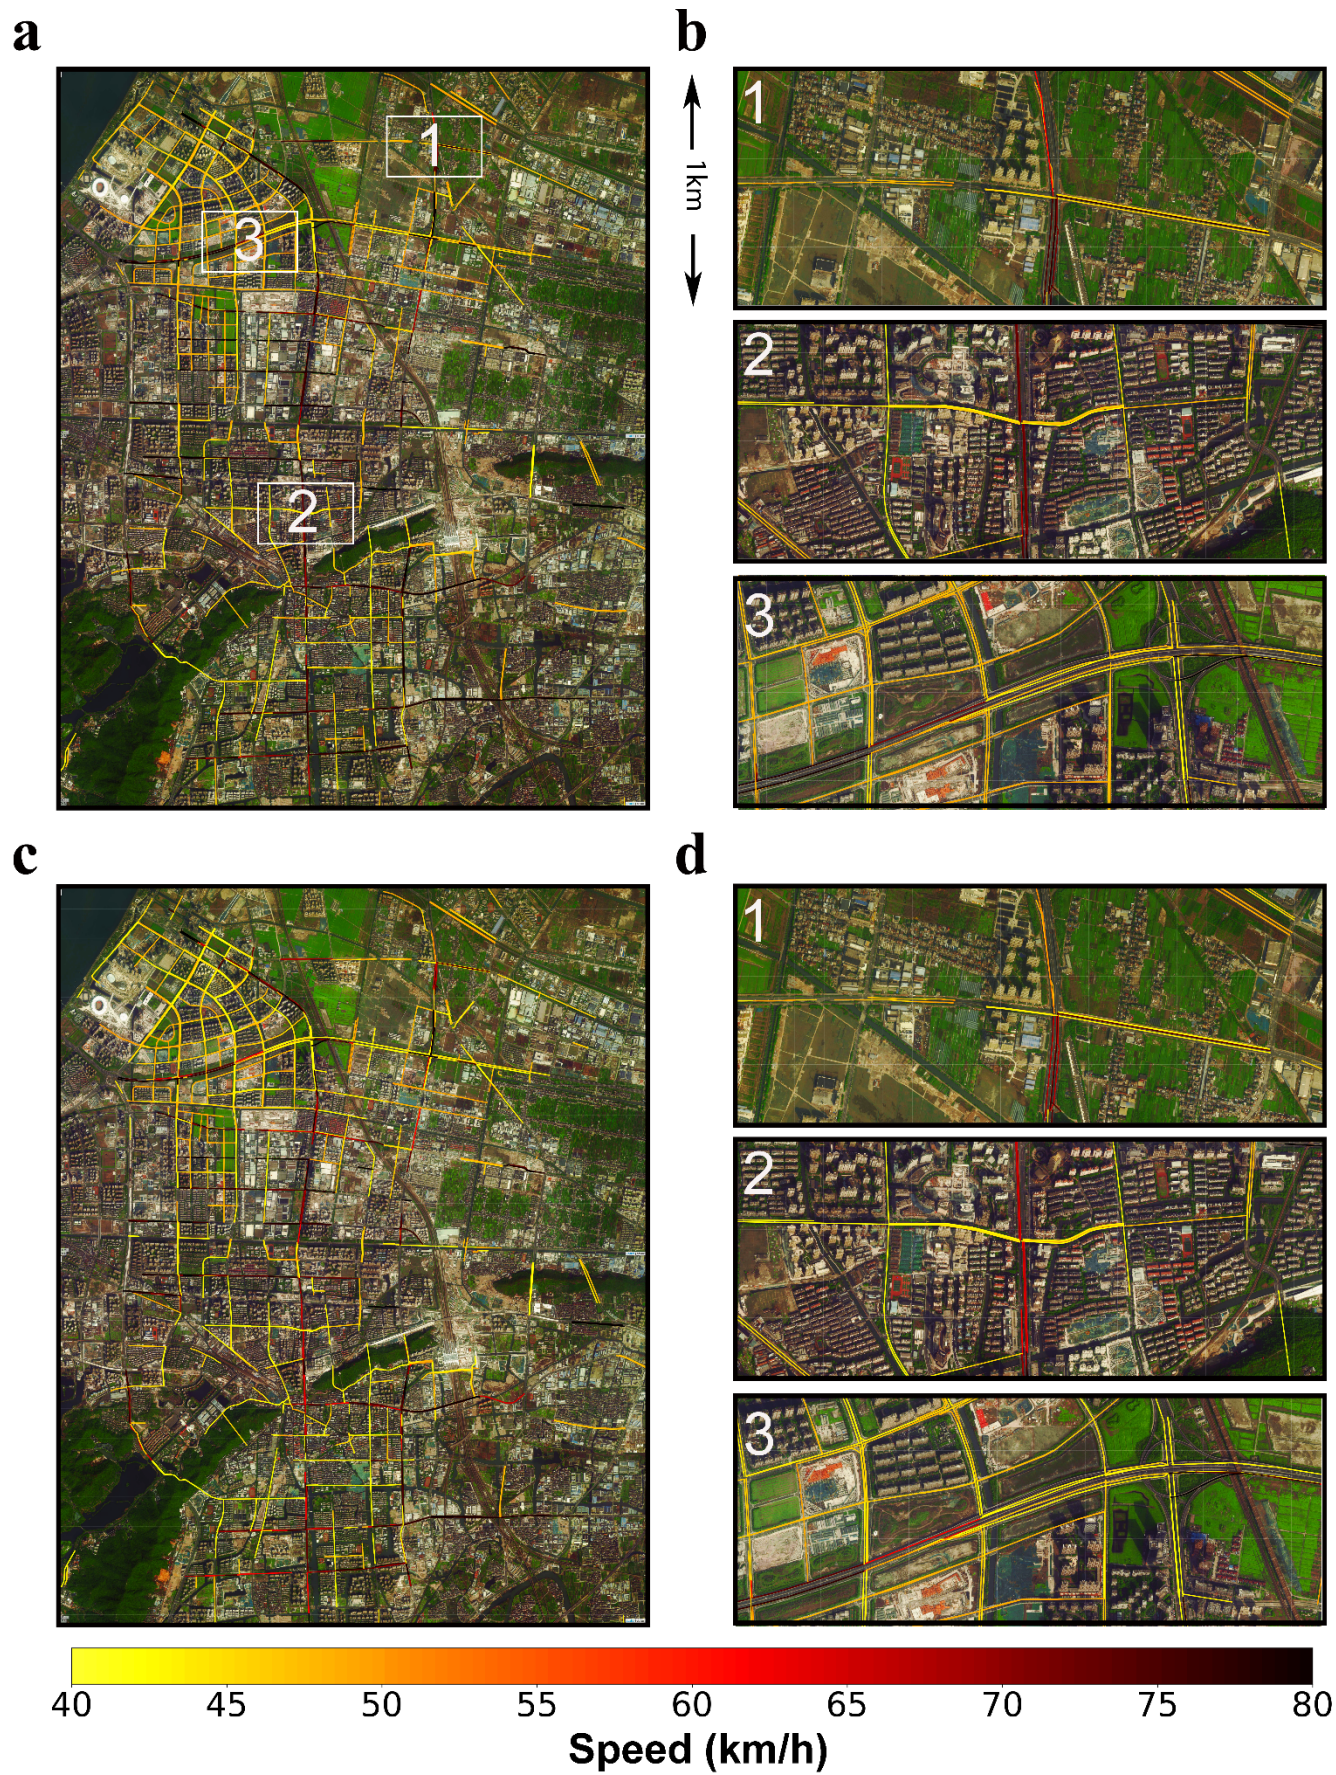

29

30 **Figure S4.** The same as Figs. 3a ~ 3d but for vehicle-specific speeds. Map data © 2021, Gaode Map.



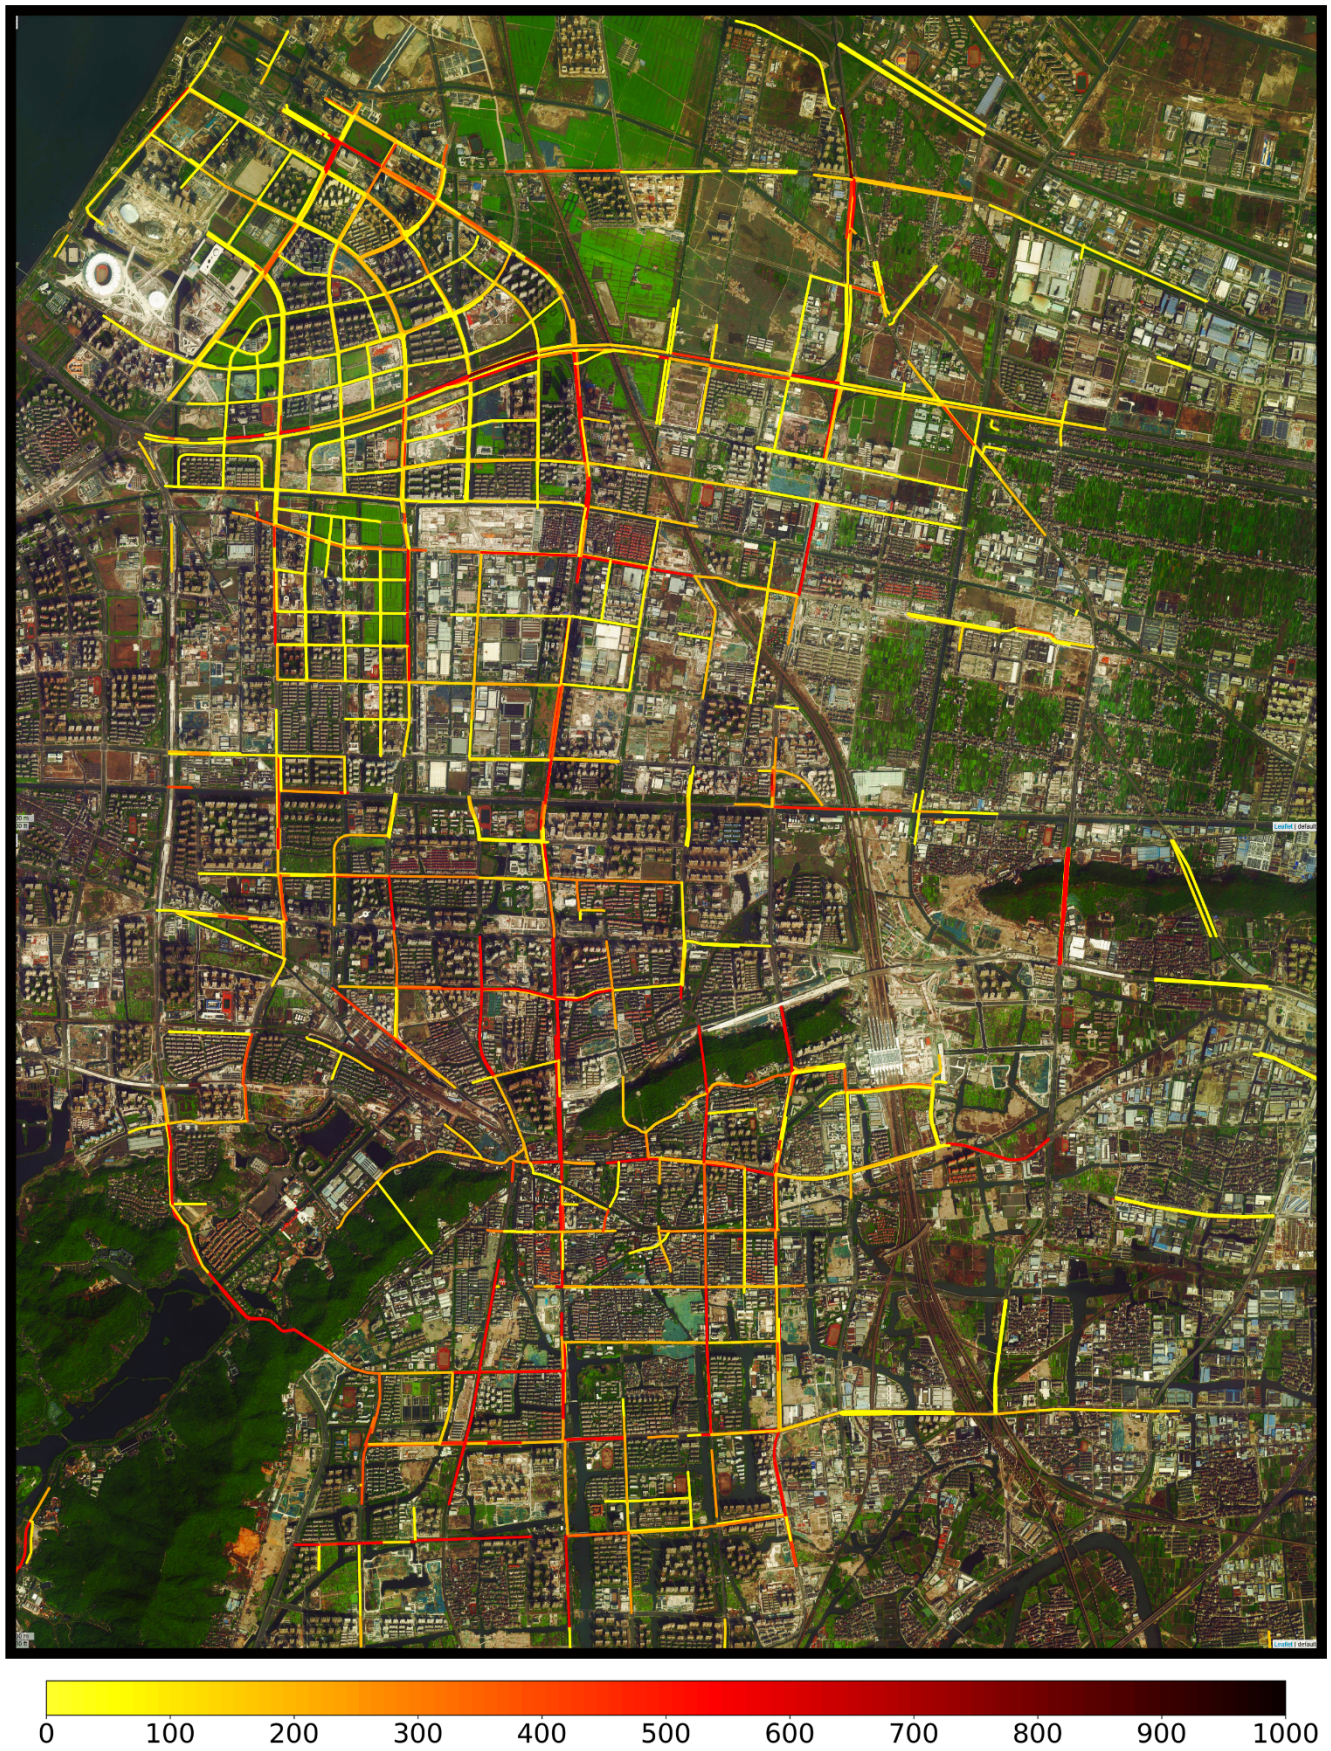

**Figure S5.** Hyperfine-resolution mapping of different proportions of vehicle categories over the Xiaoshan District, including light duty vehicles (LDVs), middle duty vehicle (MDVs), light duty truck (LDTs), middle duty truck (MDTs). Map data © 2021, Gaode Map.



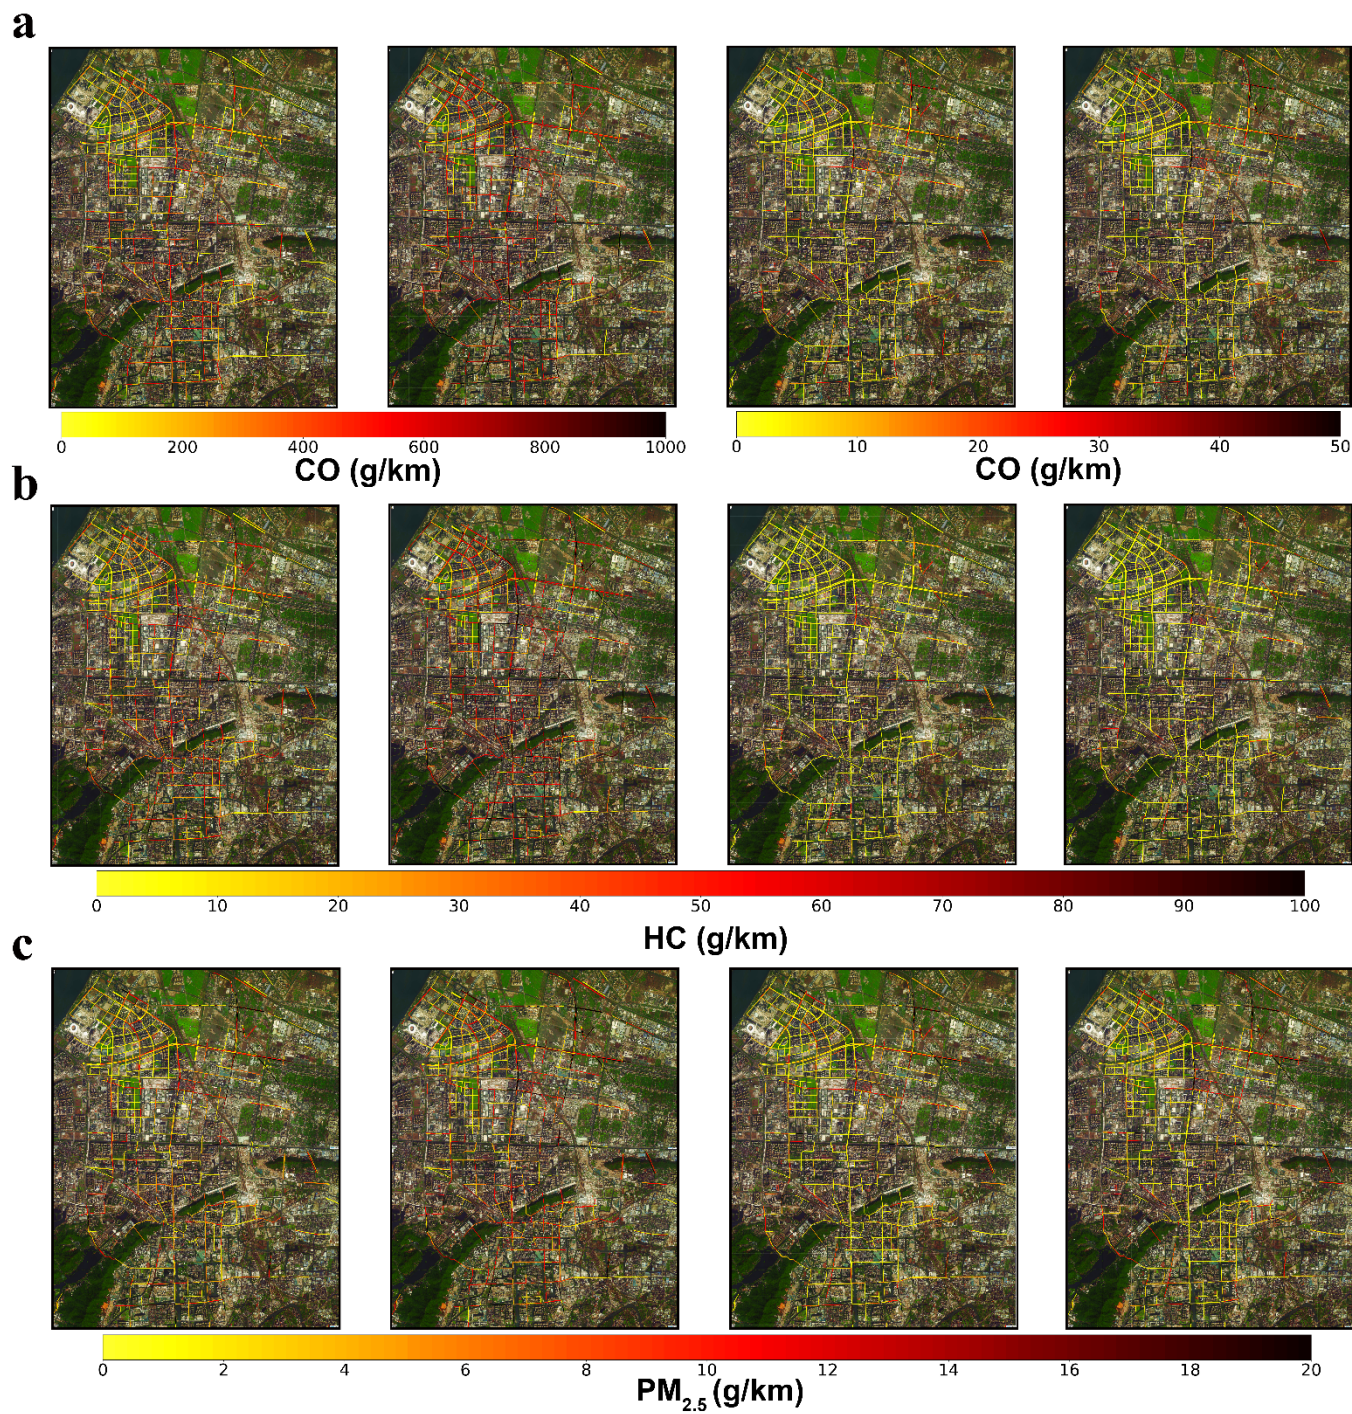

**Figure S6.** The same as Fig. 5a but for (a) CO, (b) HC, and (c) PM<sub>2.5</sub>. Map data © 2021, Gaode Map.

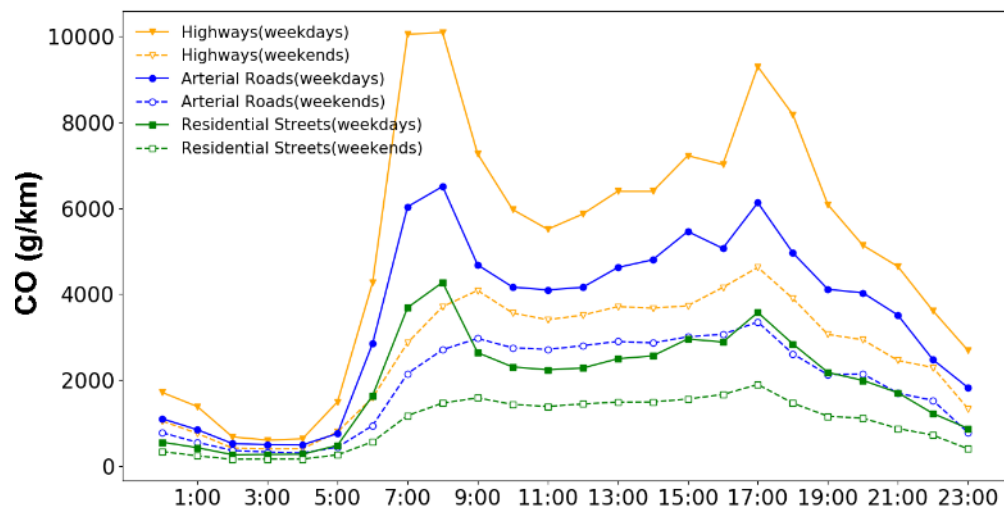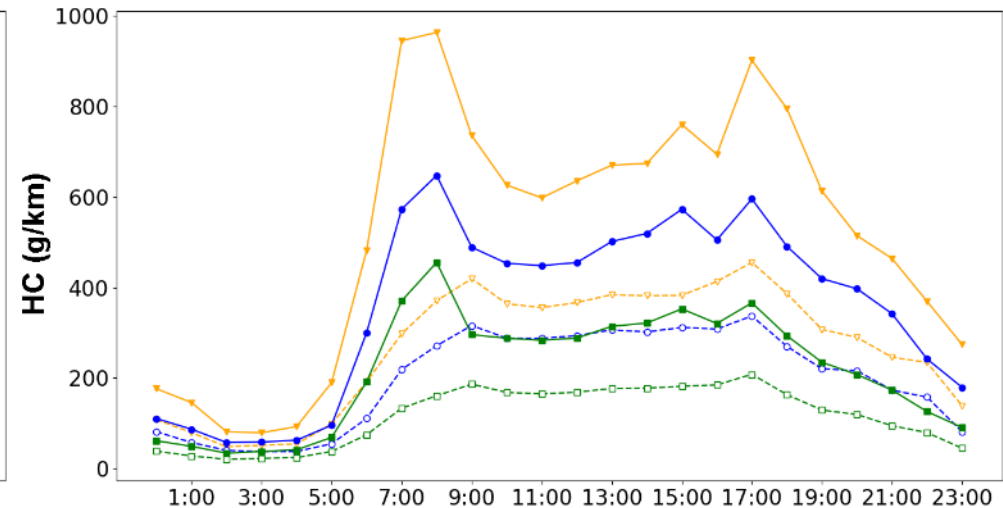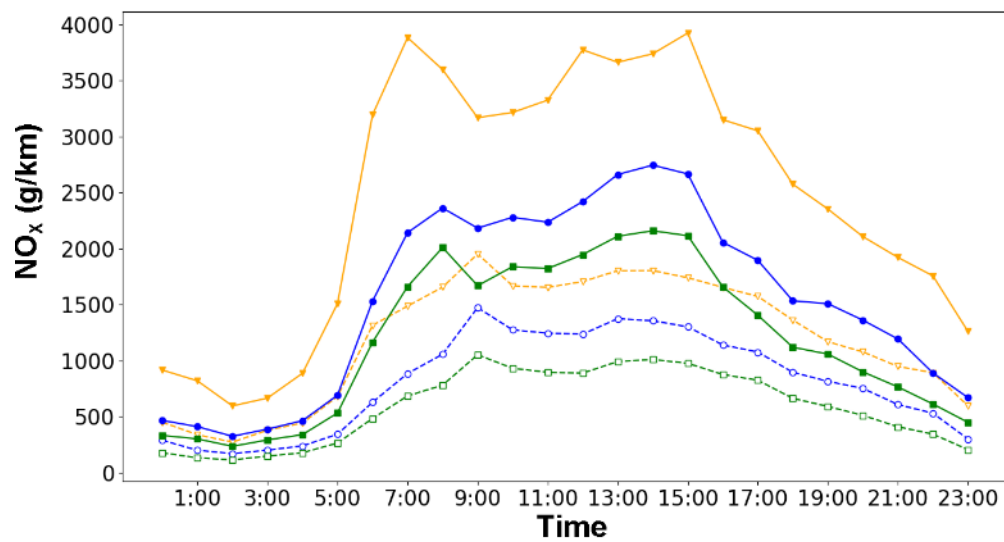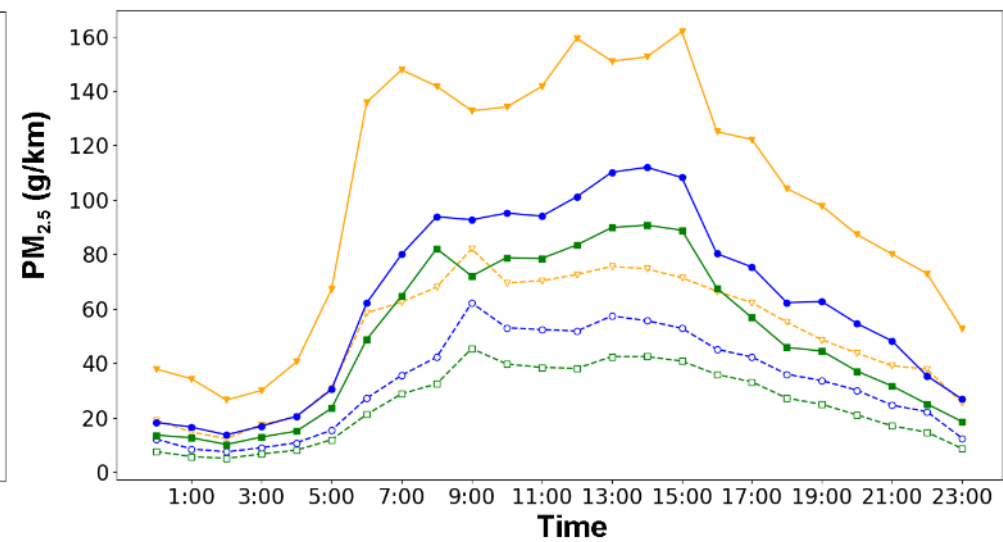

Figure S7. Hourly variation of CO, HC, NO<sub>x</sub>, and PM<sub>2.5</sub> by road types on weekdays and weekends.



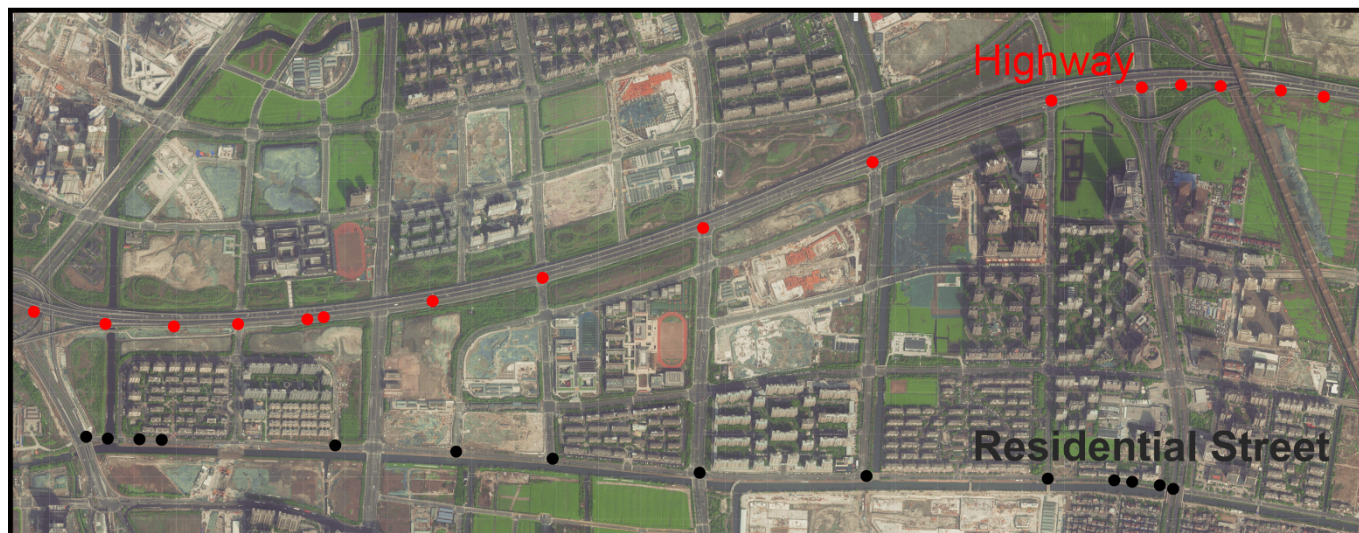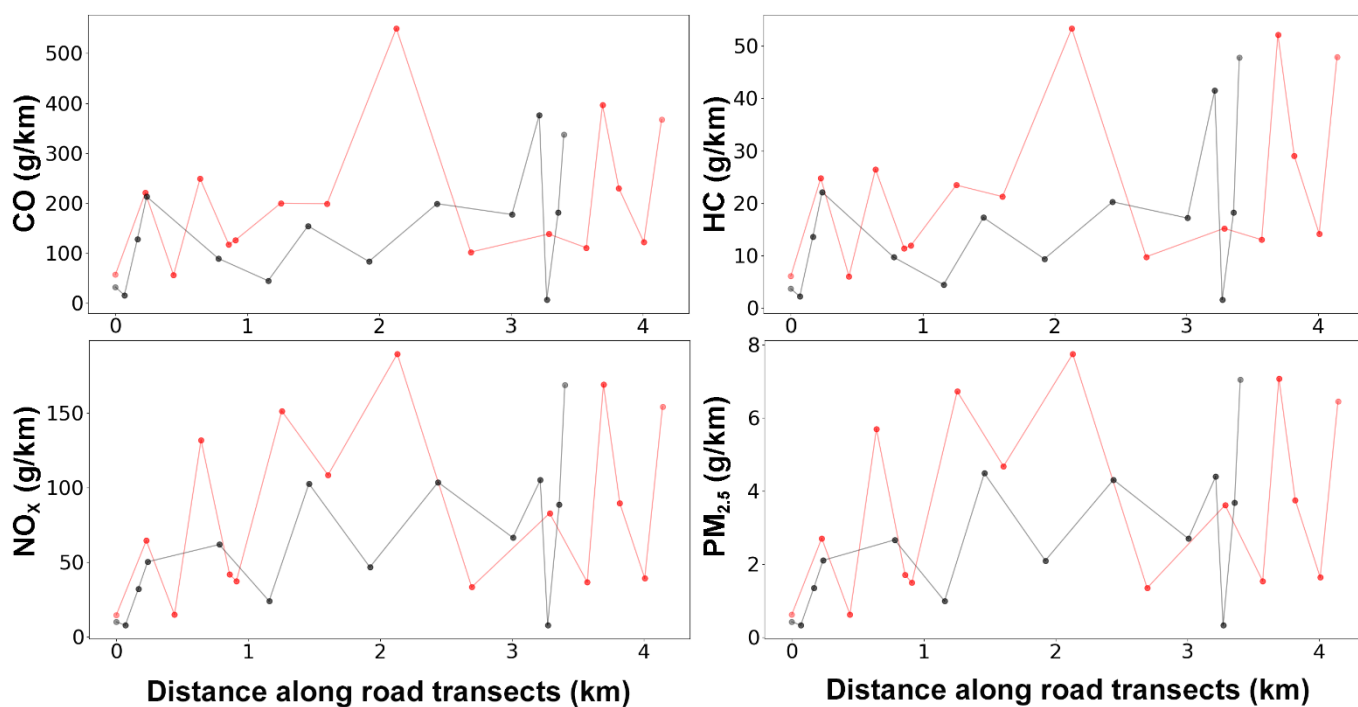

**Figure S8. Comparison of on-road vehicle emissions between a highway (i.e., Airport Road) and a residential street (i.e., Wenming Road).** Emissions are plotted as a function of cumulative distance along each road route. The road transects correspond to the locations of traffic monitoring (Top panel). Map data © 2021, Gaode Map.



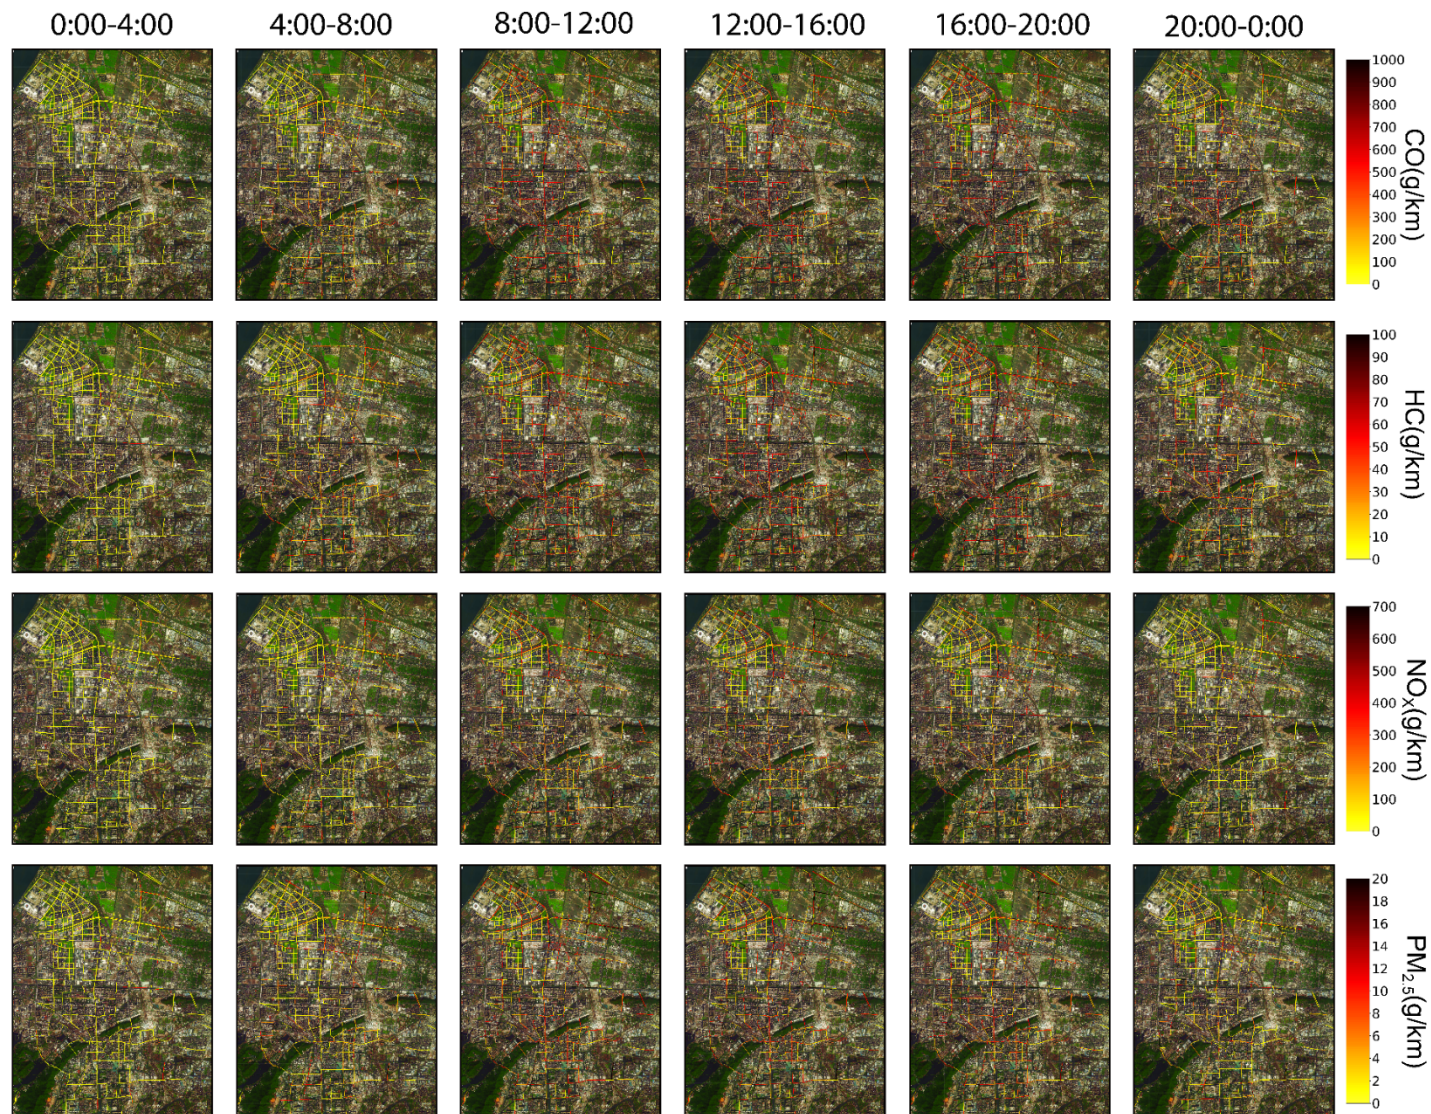

**Figure S9. Hyperfine-resolution mapping of hourly on-road vehicle emissions over the Xiaoshan District.** Hourly averages (every four hours) of on-road vehicle emissions for each road segment. Map data © 2021, Gaode Map.



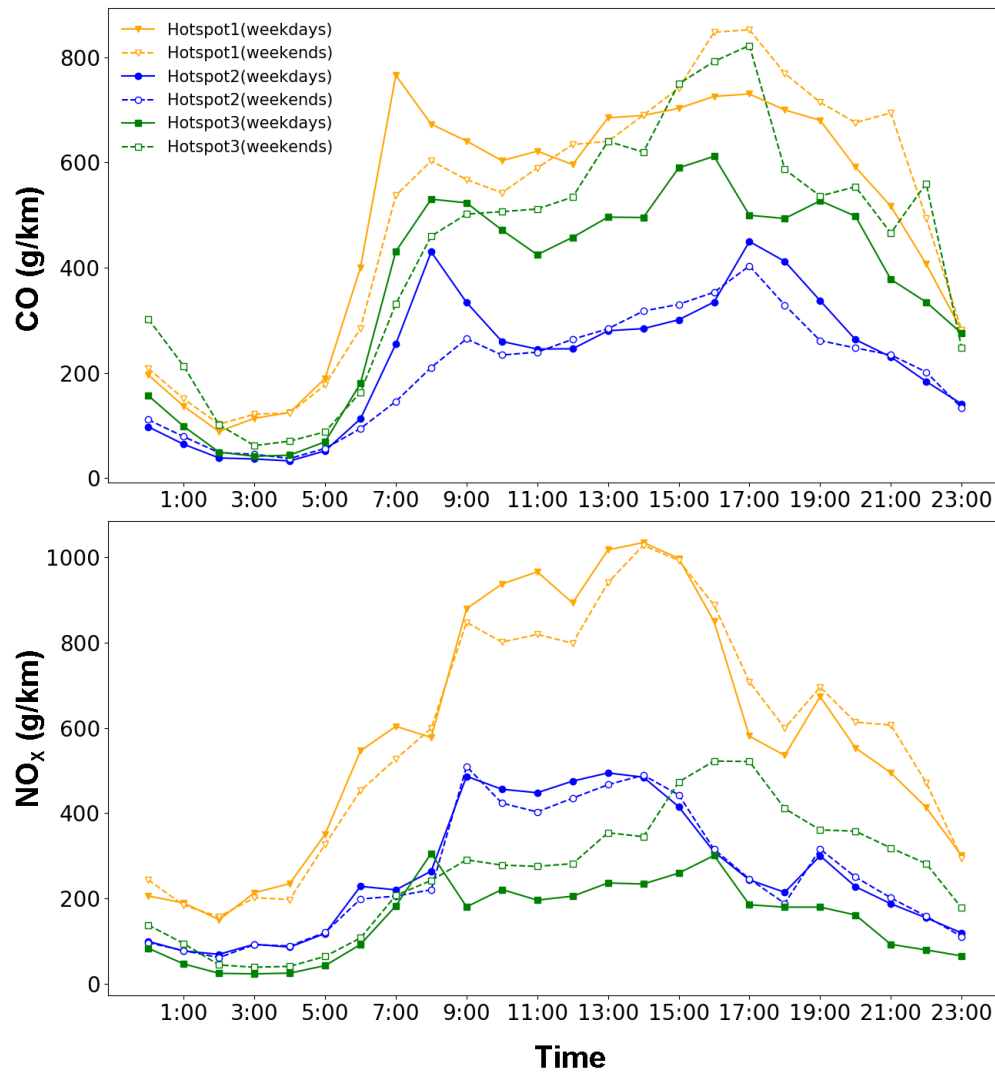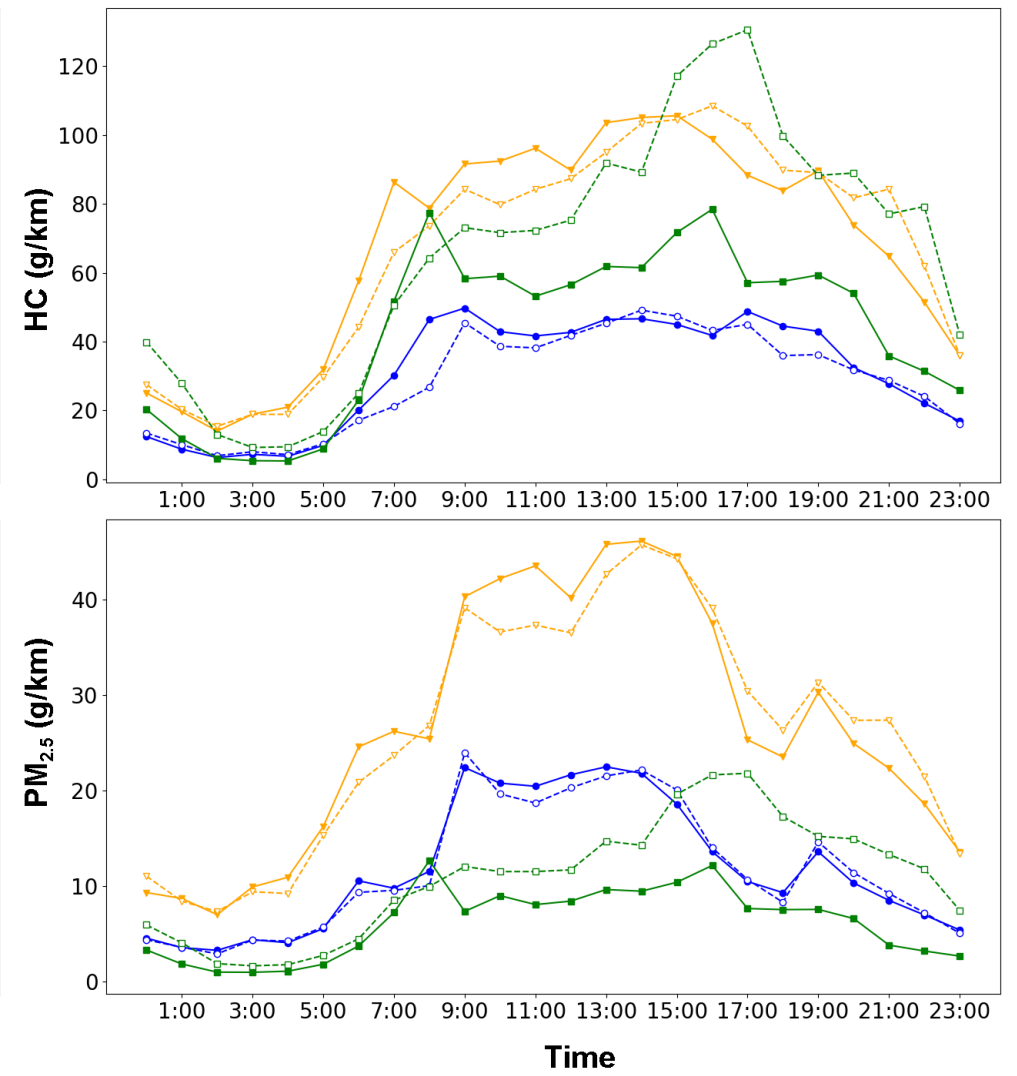

**Figure S10. Hourly variations of on-road vehicle emission hotspots intensities.** The hotspots are presented in Fig. 2.

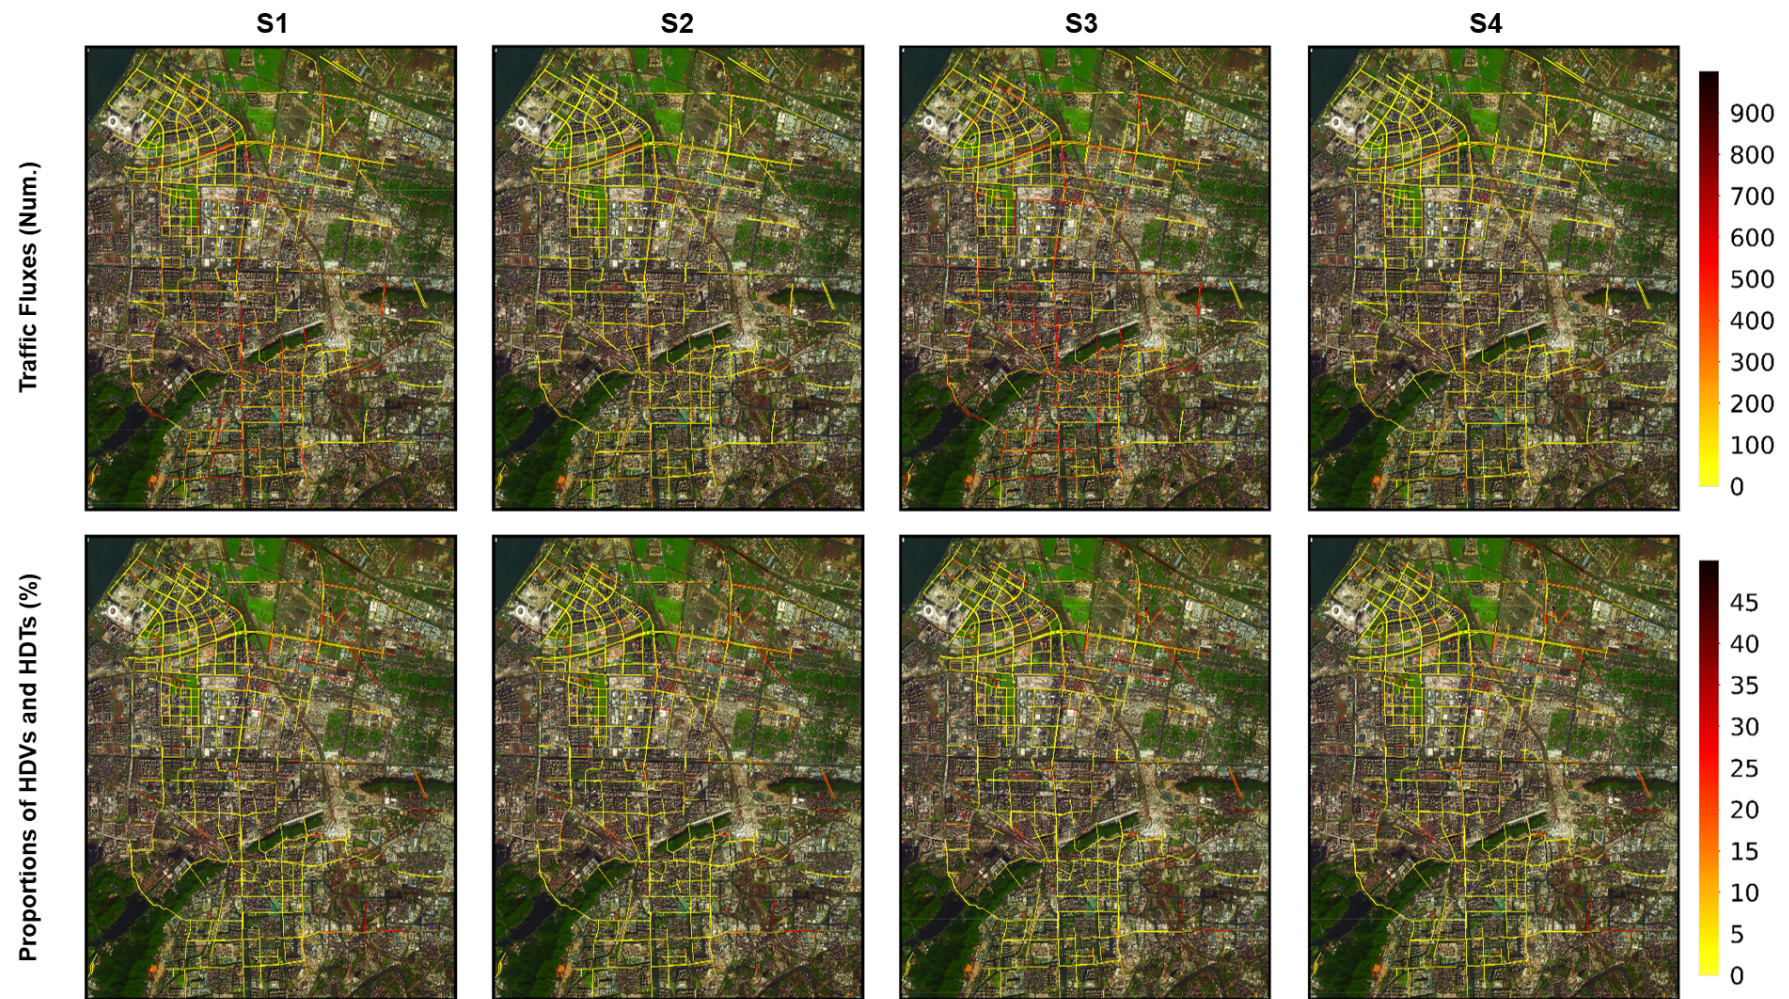

**Figure S11.** Impacts of traffic control strategies, including the (a) S1, (b) S2, (c) S3, and (d) S4 scenarios, on the traffic fluxes and fleet compositions (HDVs and HDTs). Map data © 2021, Gaode Map.



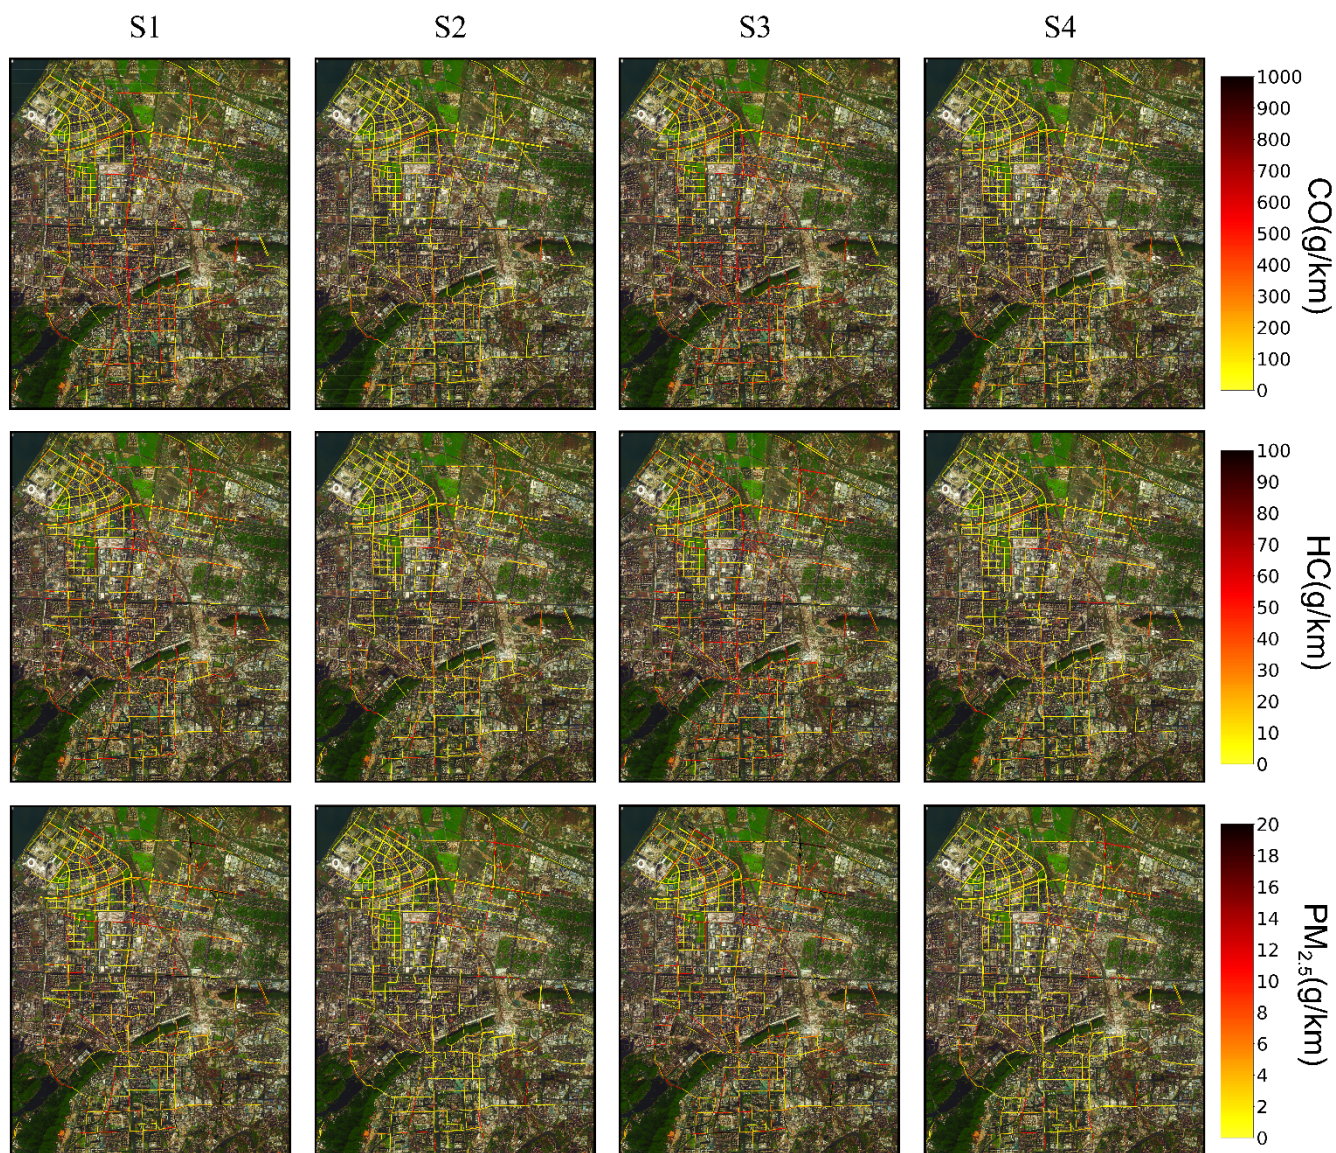

**Figure S12. Impacts of traffic control strategies on daily average on-road vehicle emissions.** Map data © 2021, Gaode Map.

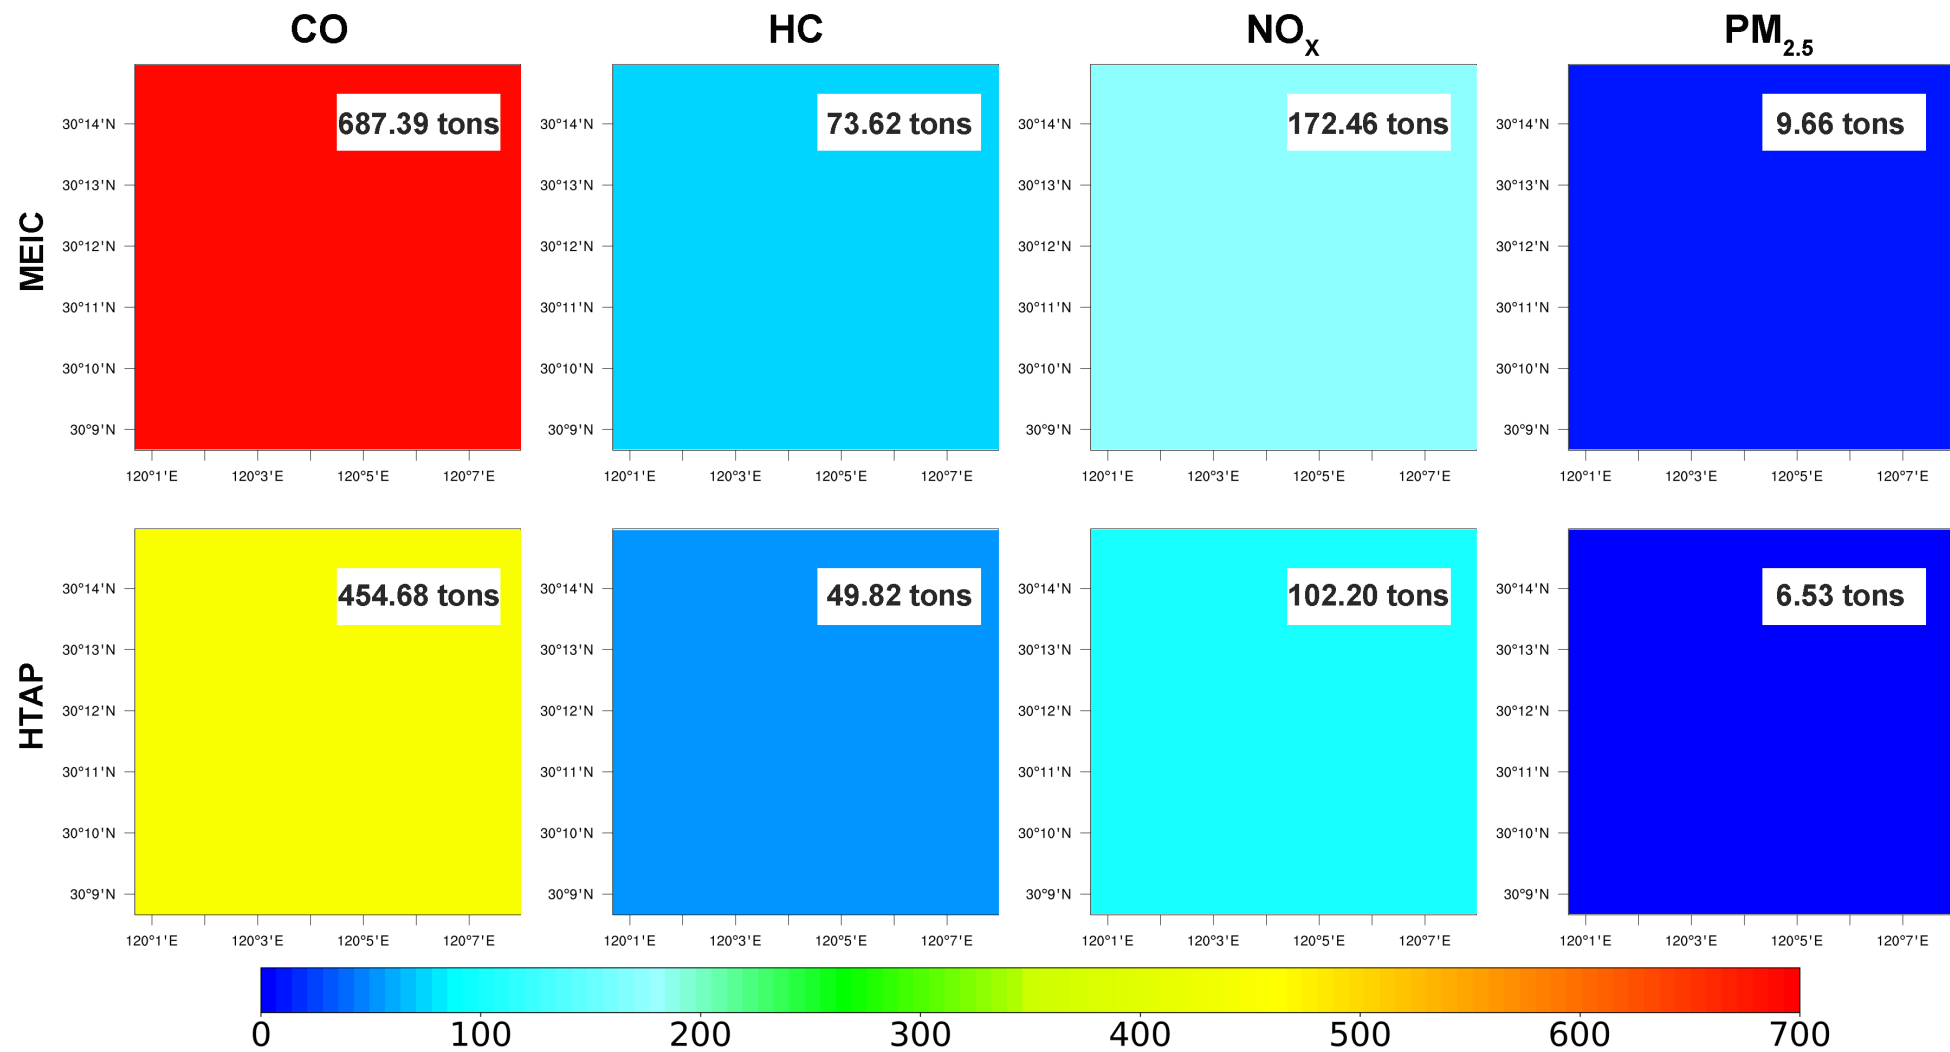

Figure S13. Spatial distributions of monthly transportation emissions in MEICv1.3 and HTAPv2.2.

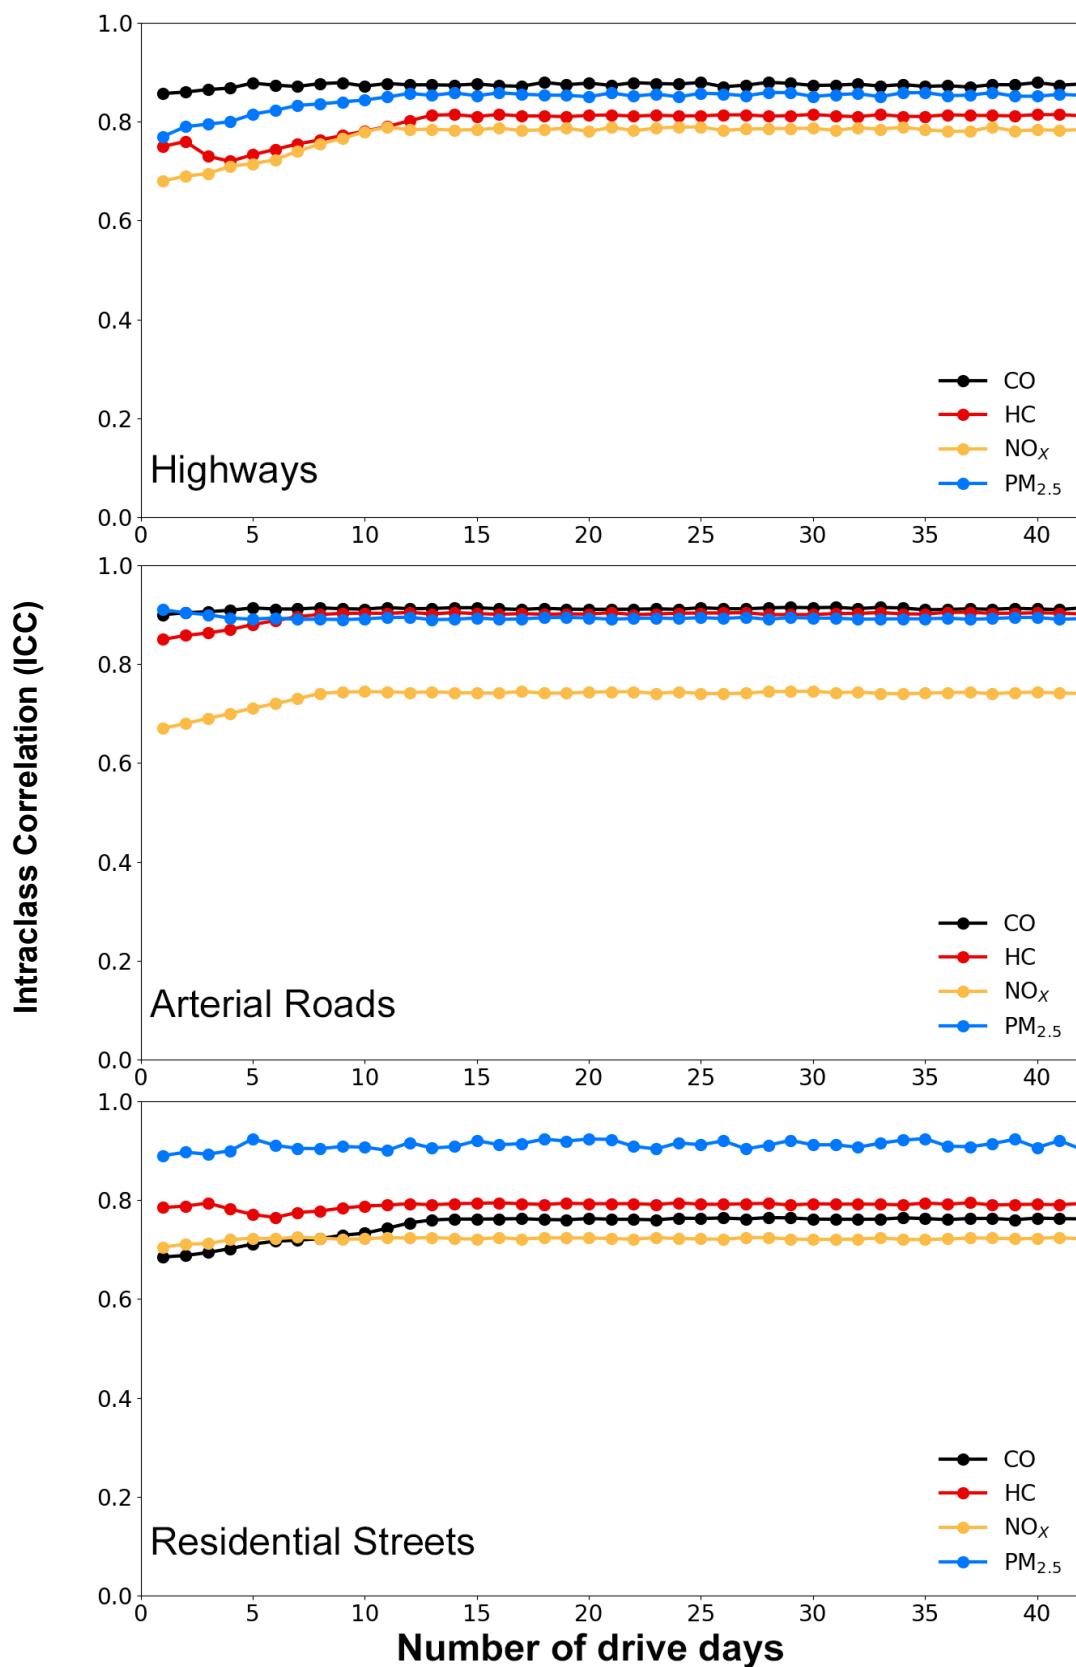

**Figure S14. Systematic subsampling and Intraclass Correlation (ICC).** Intraclass correlation (ICC) for CO, HC, NO<sub>x</sub>, and PM<sub>2.5</sub> as a function of the number of weekdays, presented separately for highways, arterial roads, and residential streets.

66 **Table S1. The summary of on-road vehicle emissions.**

| Road                | Length   | Vehicle category | Emission (g) / Emission intensity (g/km) |                |                 |                   |
|---------------------|----------|------------------|------------------------------------------|----------------|-----------------|-------------------|
|                     |          |                  | CO                                       | HC             | NO <sub>x</sub> | PM <sub>2.5</sub> |
| Arterial roads      | 140.08km | Total            | 46310.45/330.60                          | 5495.34/39.23  | 22099.02/157.76 | 927.33/6.62       |
|                     |          | HDVs and HDTs    | 1285.93/9.18                             | 1312.55/9.37   | 13310.40/95.02  | 598.14/4.27       |
| Residential streets | 536km    | Total            | 91848.96/171.36                          | 14236.16/26.56 | 72477.92/135.22 | 3044.48/5.68      |
|                     |          | HDVs and HDTs    | 5772.72/10.77                            | 6507.04/12.14  | 56280/105.00    | 2454.88/4.58      |
| Highways            | 14.16km  | Total            | 3556.43/251.16                           | 386.71/27.31   | 1526.87/107.83  | 64.29/4.54        |
|                     |          | HDVs and HDTs    | 86.09/6.08                               | 77.03/5.44     | 942.49/66.56    | 43.19/3.05        |

67  
68 **Table S2. Intraclass correlation (ICC) by road type and pollutant.**

| Pollutant         | Arterial roads | Residential streets | Highways |
|-------------------|----------------|---------------------|----------|
| CO                | 0.91           | 0.76                | 0.78     |
| HC                | 0.90           | 0.79                | 0.85     |
| NO <sub>x</sub>   | 0.74           | 0.72                | 0.87     |
| PM <sub>2.5</sub> | 0.89           | 0.90                | 0.81     |

69  
70
